# Supplementary material
Source: publisher site journal article supplement (https://www.spandidos-publications.com/7278/downloadSupplementary)
Supplement: Supplementary file 1 [file downloadSupplementary]

Table SI. Newcastle-Ottawa scale score of the included studies.

| First author,<br>year           | Selection (4 stars)                            |                                               |                              |                                                                                           | Comparability<br>(2 stars) | Outcome (3 stars)        |                                                               |                                           | Total<br>score | (Refs.) |
|---------------------------------|------------------------------------------------|-----------------------------------------------|------------------------------|-------------------------------------------------------------------------------------------|----------------------------|--------------------------|---------------------------------------------------------------|-------------------------------------------|----------------|---------|
|                                 | Representativeness<br>of the exposed<br>cohort | Selection of<br>the non-<br>exposed<br>cohort | Ascertainment<br>of exposure | Demonstration that the<br>outcome of interest<br>was not present at the<br>start of study |                            | Assessment<br>of outcome | Was follow-<br>up long<br>enough for<br>outcomes to<br>occur? | Adequacy of<br>follow-up of<br>the cohort |                |         |
| Allenet <i>et al</i> ,<br>2022  | ★                                              | ★                                             | ★                            | ★                                                                                         | ★                          | ★                        | ★                                                             | ★                                         | 8              | (27)    |
| Parosanu <i>et al</i> ,<br>2023 | ★                                              | ★                                             | ★                            | ★                                                                                         | ★                          | ★                        | ★                                                             | ★                                         | 8              | (39)    |
| Korkmaz <i>et al</i> ,<br>2023  | ★                                              | ★                                             | ★                            | ★                                                                                         | -                          | ★                        | ★                                                             | ★                                         | 7              | (28)    |
| Parosanu <i>et al</i> ,<br>2023 | ★                                              | ★                                             | ★                            | ★                                                                                         | -                          | ★                        | ★                                                             | ★                                         | 7              | (40)    |
| Nagamoto <i>et al</i> ,<br>2023 | ★                                              | ★                                             | ★                            | ★                                                                                         | ★                          | ★                        | ★                                                             | ★                                         | 8              | (41)    |
| Asif <i>et al</i> ,<br>2023     | ★                                              | ★                                             | ★                            | ★                                                                                         | ★                          | ★                        | ★                                                             | ★                                         | 8              | (32)    |
| Ni <i>et al</i> , 2022          | ★                                              | ★                                             | ★                            | ★                                                                                         | ★                          | ★                        | ★                                                             | ★                                         | 8              | (42)    |
| Chaker <i>et al</i> ,<br>2022   | ★                                              | ★                                             | ★                            | ★                                                                                         | ★                          | ★                        | ★                                                             | ★                                         | 8              | (43)    |
| Tucker <i>et al</i> ,<br>2021   | ★                                              | ★                                             | ★                            | ★                                                                                         | ★                          | ★                        | ★                                                             | ★                                         | 8              | (29)    |
| Wang <i>et al</i> ,<br>2023     | ★                                              | ★                                             | ★                            | ★                                                                                         | ★                          | ★                        | ★                                                             | -                                         | 7              | (44)    |
| Shang <i>et al</i> ,<br>2021    | ★                                              | ★                                             | ★                            | ★                                                                                         | ★                          | ★                        | ★                                                             | ★                                         | 8              | (7)     |
| Wang <i>et al</i> ,<br>2023     | ★                                              | ★                                             | ★                            | ★                                                                                         | ★                          | ★                        | ★                                                             | ★                                         | 8              | (45)    |
| Young <i>et al</i> ,<br>2024    | ★                                              | ★                                             | ★                            | ★                                                                                         | ★                          | ★                        | ★                                                             | ★                                         | 8              | (31)    |

|                                   |   |   |   |   |   |   |   |   |   |      |
|-----------------------------------|---|---|---|---|---|---|---|---|---|------|
| Khan <i>et al</i> ,<br>2022       | ★ | ★ | ★ | ★ | ★ | ★ | ★ | ★ | 8 | (46) |
| Cheng <i>et al</i> ,<br>2023      | ★ | ★ | ★ | ★ | ★ | ★ | ★ | ★ | 8 | (47) |
| Zhang <i>et al</i> ,<br>2023      | ★ | ★ | - | ★ | ★ | ★ | ★ | ★ | 7 | (48) |
| Cordeiro <i>et al</i> ,<br>2022   | ★ | ★ | ★ | ★ | ★ | ★ | ★ | ★ | 8 | (30) |
| Anpalakhan <i>et al</i> ,<br>2023 | ★ | ★ | - | ★ | ★ | ★ | ★ | ★ | 7 | (49) |
| Rebuzzi <i>et al</i> ,<br>2022    | ★ | ★ | ★ | ★ | ★ | ★ | ★ | ★ | 8 | (50) |
| Aslan <i>et al</i> ,<br>2022      | ★ | ★ | ★ | ★ | ★ | ★ | ★ | ★ | 8 | (51) |
| Ueda <i>et al</i> ,<br>2022       | ★ | ★ | ★ | ★ | ★ | ★ | ★ | ★ | 8 | (52) |

-, the data were not available.
